# Supplementary material for: Human Factors and Data Logging Processes With the Use of Advanced Technology for Adults With Type 1 Diabetes: Systematic Integrative Review
Source: PubMed Central journal article supplement (PMC5871738; doi:10.2196/humanfactors.9049), 2018-03-15

## Multimedia appendix 2, Prisma flow diagram

Prisma Flow Diagram[26]

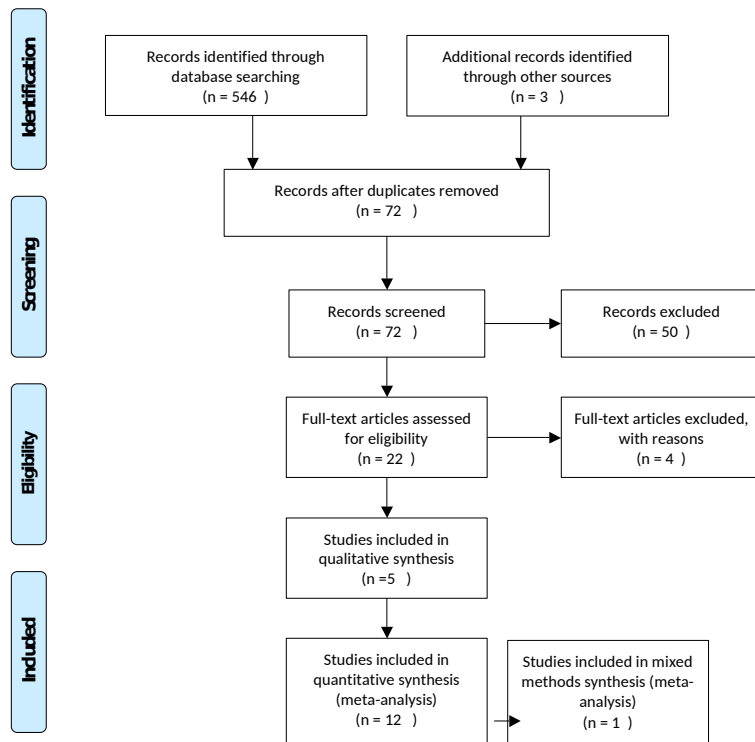

Supplement: humanfactors_v5i1e11_app2.pdf [file humanfactors_v5i1e11_app2.pdf]
